# Supplementary material for: Cusp observation at Saturn's high-latitude magnetosphere by the Cassini spacecraft
Source: PubMed Central journal article supplement — Geophys Res Lett. 2014 Mar 10;41(5):1382–8. doi: 10.1002/2014GL059319 (PMC4373149; doi:10.1002/2014gl059319), 2014-03-10
Supplement: grl0041-1382-sd1.pdf [file grl0041-1382-sd1.pdf]

Auxiliary material for:

Cusp observation at Saturn's high latitude magnetosphere by the Cassini spacecraft

J. M. Jasinski {1,2}, C. S. Arridge {1,2}, L. Lamy {3}, J. S. Leisner {4},  
M. F. Thomsen {5}, D. G. Mitchell {6}, A. J. Coates {1,2}, A. Radioti {7},  
G. H. Jones {1,2}, E. Roussos {8}, N.Krupp {8}, D. Grodent {7},  
M. K. Dougherty {5} and J. H. Waite {9}

{1} Mullard Space Science Laboratory, University College London, UK.

{2} The Centre for Planetary Sciences at UCL/Birkbeck, London, UK.

{3} LESIA, Observatoire de Paris, CNRS, UPMC, Universite Paris 6, Universite  
Paris Diderot, Meudon, France.

{4} Blackett Laboratory, Imperial College London, UK.

{5} Planetary Science Institute, Tucson, Arizona, USA.

{6} Applied Physics Laboratory, Johns Hopkins University, Laurel, Maryland,  
USA.

{7} University de Liege, Belgium.

{8} Max Planck Institute for Solar System Research, Katlenburg-Lindau,  
Germany.

{9} Southwest Research Institute, San Antonio, Texas, USA.

Geophysical Research Letters

Introduction

This file explains in more detail some of the methods used in the paper as well as presents information about the instrumentation used. Four figures are included.
