# Supplementary material for: Cusp observation at Saturn's high-latitude magnetosphere by the Cassini spacecraft
Source: PubMed Central journal article supplement — Geophys Res Lett. 2014 Mar 10;41(5):1382–8. doi: 10.1002/2014GL059319 (PMC4373149; doi:10.1002/2014gl059319), 2014-03-10
Supplement: grl0041-1382-sd2.pdf [file grl0041-1382-sd2.pdf]

**<sup>1</sup> Supporting online material: Observations of Saturn's  
<sup>2</sup> magnetospheric cusp**

J. M. Jasinski,<sup>1,2</sup> C. S. Arridge,<sup>1,2</sup> L. Lamy,<sup>3</sup> J. S. Leisner,<sup>4</sup> M. F. Thomsen,<sup>5</sup>

D. G. Mitchell,<sup>6</sup> A. J. Coates,<sup>1,2</sup> A. Radioti,<sup>7</sup> G. H. Jones,<sup>1,2</sup> E. Roussos,<sup>8</sup>

N.Krupp,<sup>8</sup> D. Grodent,<sup>7</sup> M. K. Dougherty,<sup>5</sup> and J. H. Waite<sup>9</sup>

---

<sup>1</sup>Mullard Space Science Laboratory,  
University College London, UK.

<sup>2</sup>The Centre for Planetary Sciences at  
UCL/Birkbeck, London, UK.

<sup>3</sup>LESIA, Observatoire de Paris, Université  
Paris Diderot, France.

<sup>4</sup>Blackett Laboratory, Imperial College  
London, UK.

<sup>5</sup>Planetary Science Institute, Tucson,  
Arizona, USA.

<sup>6</sup>Applied Physics Laboratory, Johns  
Hopkins University, Laurel, Maryland, USA.

<sup>7</sup>Université de Liège, Liege, Belgium.

<sup>8</sup>Max-Planck-Institut für  
Sonnensystemforschung, Göttingen,  
Germany.

<sup>9</sup>Southwest Research Institute, San  
Antonio, Texas, USA.

3 In this online supporting material, we present some of the methods and analysis not  
4 included in the main paper submitted to GRL.

## 1. Instrumentation

5 Four of the six suites of in situ instruments located onboard Cassini are used for the  
6 analysis in this paper: the Cassini Plasma Spectrometer (CAPS), Dual Technique Mag-  
7 netometer (MAG), Magnetospheric Imaging Instrument (MIMI), and Radio & Plasma  
8 Wave Science (RPWS).

9 The data from the following instruments were used: the Electron Spectrometer (ELS)  
10 and Ion Mass Spectrometer (IMS) from CAPS [*Young et al.*, 2004]; the low energy mag-  
11 netospheric measurements system (LEMMS) from MIMI [*Krimigis et al.*, 2004]; the MAG  
12 instrument [*Dougherty et al.*, 2004]; and the Low, Medium and High Frequency Receivers  
13 (LFR, MFR, and HFR) of the Radio Plasma Wave Science (RPWS) instrument [*Gurnett*  
14 *et al.*, 2004]. We also present auroral data from the Ultraviolet Imaging Spectrograph  
15 (UVIS) onboard Cassini [*Esposito et al.*, 2004].

16 To complete the picture of the solar wind upstream conditions at Saturn, we present  
17 model heliospheric data at Saturn (ENLIL) produced by Community Coordinated Mod-  
18 eling Center (CCMC), to accompany interpretation of the Saturn Kilometric data (SKR)  
19 from RPWS.

## 2. Observations

20 Figure A shows the KSM X-Z projection of the trajectory of the Cassini spacecraft  
21 during these observations. The Sun is to the right and the view is from dawn. The  
22 section of the trajectory highlighted in red shows the part of the trajectory where we

23 observe the cusp. We can see that Cassini is travelling in a poleward trajectory and  
24 observes the cusp in the high latitudes.

25 The ions observed in what we identify as the cusp ( $\sim 1100$ - $1900$  UT) have a mass  
26 composition entirely consistent with a solar wind origin. We base this conclusion on the  
27 following arguments:

28 1) From  $\sim 1100$  to  $\sim 1400$  UT, the spacecraft was rolling, so the CAPS field of view  
29 covered the full sky, with a period of  $\sim 30$  minutes. Throughout this whole interval, the  
30 CAPS SNG ion data show a steady population with a single peak between  $\sim 200$  eV and  
31  $\sim 2$  keV (Figure 1 of main paper). While there is some weak modulation with actuation  
32 and roll during this interval, there is no hidden ion population that only shows up at some  
33 special look direction.

34 2) Between 1100 and 1400 UT, CAPS obtained 6 time-of-flight (TOF) accumulations,  
35 each covering 512 seconds, and phased by  $\sim 60$  degrees from one accumulation to the next.  
36 Hence, we have TOF coverage over essentially the full sky. TOF measurements between  
37 1100 and 1400 show zero  $W^+$  ions; rather, there are substantial numbers of counts in  
38  $H^+$  and  $m/q=2$  (either  $He^{++}$  if the plasma is of solar wind origin, or  $H^{2+}$  if it is of  
39 magnetospheric origin [e.g., *Thomsen et al.*, 2010]). The light ion counts cover precisely  
40 the energy range of the single peak observed persistently in the SNG data. If the TOF  
41 accumulation is extended to cover the entire time range from 1100 to 1800 UT, we still  
42 find zero  $W^+$  counts. There are some signs of very small amounts of  $W^+$  ions present,  
43 however they are sporadic and around the 1-count level, such that if any  $W^+$  population  
44 is present, it is essentially below the threshold for CAPS detectability.

3) In addition to the absence of  $W^+$ , the light-ion composition provides a useful signature of the origin of the plasma. In particular, from the few valid numerical moments obtained during the interval 1100-1800 UT (i.e., when the spacecraft was not rolling, basically 1130-1215 and 1400-1800 UT), the derived values of the light ion densities were in the ratio ( $m/q=2:m/q=1$ ) $\sim 0.01-0.04$ , entirely consistent with solar wind composition and well below typical values of  $>0.1$  (even up to 1) seen in the outer magnetosphere [e.g., *Thomsen et al.*, 2010]. This can be seen in Figure B. Indeed, in the most recent interval of clearly magnetospheric plasma prior to the cusp interval ( $\sim 1900-2000$  UT on 20 January), the ratio was  $\sim 0.7-0.9$ . While it might be argued that during the non-rolling intervals from which the cusp moments were obtained the field of view may not have encompassed the main population, similar ratios ( $\sim 0.01-0.04$ ) emerge from the integrations done while the spacecraft was rolling as well.

## 2.1. Estimating the Upstream Conditions

In Figure C we present model heliospheric solar wind conditions at Saturn modelled by ENLIL. ENLIL is a 3D magnetohydrodynamic model of the heliosphere that is time-dependent. It uses and finds the solutions to equations regarding plasma, magnetic field, momentum and energy transport using a Flux-Corrected-Transport algorithm, with initial and boundary conditions based on solar observations [*Odstrcil*, 2003]. The model predicts a modest increase in the velocity, magnetic strength and ram pressure at Saturn leading up to the day of the observations of the cusp, marked with a dashed line.

In Figure D we present high resolution dynamic spectra of RPWS-HFR data between 3.5 and 1500kHz, of the SKR observations [*Lamy et al.*, 2008]. The figure is of the whole

66 day on the 21st of January 2009, with time in hours at the bottom. During the time  
 67 we have identified as a cusp crossing, there were intense SKR emissions extending to low  
 68 frequencies (as low as 3.5kHz).

69 Both the model and the observations of the SKR suggest that the magnetosphere is being  
 70 compressed making the conditions favourable for the occurrence of dayside reconnection.

## 2.2. Calculating the field-aligned distance to the reconnection site

71 When in the cusp, *Burch et al.* [1982] showed that there is a pitch angle energy dispersion  
 72 in the ion observations. From these dispersions we can calculate the distance to the  
 73 reconnection site. This can be done using their model equation:

$$E(\alpha_o, t) = \frac{M}{2t^2} \left[ \int_{s_i}^{s_o} ds / \sqrt{1 - \sin^2 \alpha_o (B(s)/B_o)} \right]^2 \quad (1)$$

74 where  $ds$  is arc length along a dipole field line,  $s_o$  and  $s_i$  are the observation and injection  
 75 points,  $M$  is the particle mass,  $B(s)$  is the magnetic field strength along the field line,  
 76  $B_o$  is the magnetic field strength at the observation point,  $\alpha_o$  is the observed pitch angle,  
 77 and  $t$  is the transit time of the particle. The integration is made from the injection point  
 78 via the mirror point to the point of observation.

79  $B_s$  is calculated from the *Khurana et al.* [2006] model. A best-fit model dispersion curve  
 80 is created and compared to the data. The  $\chi^2$  value of the comparison between the model  
 81 and the data is calculated. The model carries a number of iterations to carry out  $\chi^2$   
 82 minimisation. The best-fit model with the lowest  $\chi^2$  is chosen.

## References

- 83 Burch, J. L., P. H. Reiff, R. A. Heelis, W. B. Hanson, J. D. Winningham, C. Gur-  
84 giolo, J. D. Menietti, J. N. Barfield, and R. A. Hoffman (1982), Plasma injection  
85 and transport in the mid-altitude polar cusp, *Geophys. Res. Lett.*, *9*, 921–924, doi:  
86 10.1029/GL009i009p00921.
- 87 Dougherty, M. K., S. Kellock, D. J. Southwood, A. Balogh, E. J. Smith, B. T. Tsurutani,  
88 B. Gerlach, K.-H. Glassmeier, F. Gleim, C. T. Russell, G. Erdos, F. M. Neubauer, and  
89 S. W. H. Cowley (2004), The Cassini Magnetic Field Investigation, *SSR*, *114*, 331–383,  
90 doi:10.1007/s11214-004-1432-2.
- 91 Esposito, L. W., C. A. Barth, J. E. Colwell, G. M. Lawrence, W. E. McClintock, A. I. F.  
92 Stewart, H. U. Keller, A. Korth, H. Lauche, M. C. Festou, A. L. Lane, C. J. Hansen,  
93 J. N. Maki, R. A. West, H. Jahn, R. Reulke, K. Warlich, D. E. Shemansky, and Y. L.  
94 Yung (2004), The Cassini Ultraviolet Imaging Spectrograph Investigation, *Space Science*  
95 *Reviews*, *115*, 299–361, doi:10.1007/s11214-004-1455-8.
- 96 Gurnett, D. A., W. S. Kurth, D. L. Kirchner, G. B. Hospodarsky, T. F. Averkamp,  
97 P. Zarka, A. Lecacheux, R. Manning, A. Roux, P. Canu, N. Cornilleau-Wehrin, P. Ga-  
98 lopeau, A. Meyer, R. Boström, G. Gustafsson, J.-E. Wahlund, L. Åhlen, H. O. Rucker,  
99 H. P. Ladreiter, W. Macher, L. J. C. Woolliscroft, H. Alleyne, M. L. Kaiser, M. D. De-  
100 sch, W. M. Farrell, C. C. Harvey, P. Louarn, P. J. Kellogg, K. Goetz, and A. Pedersen  
101 (2004), The Cassini Radio and Plasma Wave Investigation, *Space Science Reviews*, *114*,  
102 395–463, doi:10.1007/s11214-004-1434-0.
- 103 Hill, T. W., and P. H. Reiff (1977), Evidence of magnetospheric cusp proton acceleration

104 by magnetic merging at the dayside magnetopause, *J. Geophys. Res.*, *82*, 3623–3628,  
105 doi:10.1029/JA082i025p03623.

106 Khurana, K. K., et al. (2006), A Model of Saturn's Magnetospheric Field Based on Latest  
107 Cassini Observations, *Abstract #P44A-01*, presented at 2007 Fall Meeting, AGU, San  
108 Francisco, Calif., 10-14 Dec.

109 Krimigis, S. M., D. G. Mitchell, D. C. Hamilton, S. Livi, J. Dandouras, S. Jaskulek, T. P.  
110 Armstrong, J. D. Boldt, A. F. Cheng, G. Gloeckler, J. R. Hayes, K. C. Hsieh, W.-H.  
111 Ip, E. P. Keath, E. Kirsch, N. Krupp, L. J. Lanzerotti, R. Lundgren, B. H. Mauk,  
112 R. W. McEntire, E. C. Roelof, C. E. Schlemm, B. E. Tossman, B. Wilken, and D. J.  
113 Williams (2004), Magnetosphere Imaging Instrument (MIMI) on the Cassini Mission to  
114 Saturn/Titan, *Space Science Reviews*, *114*, 233–329, doi:10.1007/s11214-004-1410-8.

115 Lamy, L., P. Zarka, B. Cecconi, R. Prangé, W. S. Kurth, and D. A. Gurnett (2008),  
116 Saturn kilometric radiation: Average and statistical properties, *Journal of Geophysical*  
117 *Research (Space Physics)*, *113*, A07201, doi:10.1029/2007JA012900.

118 Lockwood, M., and M. F. Smith (1994), Low and middle altitude cusp particle signatures  
119 for general magnetopause reconnection rate variations. 1: Theory, *J. Geophys. Res.*, *99*,  
120 8531–8553, doi:10.1029/93JA03399.

121 Lockwood, M., T. G. Onsager, C. J. Davis, M. F. Smith, and W. F. Denig (1994),  
122 The characteristic of the magnetopause reconnection X-line deduced from low-  
123 altitude satellite observations of cusp ions, *Geophys. Res. Lett.*, *21*, 2757–2760, doi:  
124 10.1029/94GL02696.

125 Odstroil, D. (2003), Modeling 3-D solar wind structure, *Advances in Space Research*, *32*,



126 497–506, doi:10.1016/S0273-1177(03)00332-6.

127 Rosenbauer, H., H. Gruenwaldt, M. D. Montgomery, G. Paschmann, and N. Sckopke  
128 (1975), Heos 2 plasma observations in the distant polar magnetosphere - The plasma  
129 mantle, *J. Geophys. Res.*, *80*, 2723–2737, doi:10.1029/JA080i019p02723.

130 Thomsen, M. F., D. B. Reisenfeld, D. M. Delapp, R. L. Tokar, D. T. Young, F. J.  
131 Crary, E. C. Sittler, M. A. McGraw, and J. D. Williams (2010), Survey of ion  
132 plasma parameters in Saturn's magnetosphere, *J. Geophys. Res.*, *115*, A10220, doi:  
133 10.1029/2010JA015267.

134 Young, D. T., J. J. Berthelier, M. Blanc, J. L. Burch, A. J. Coates, R. Goldstein,  
135 M. Grande, T. W. Hill, R. E. Johnson, V. Kelha, D. J. McComas, E. C. Sittler, K. R.  
136 Svenes, K. Szegö, P. Tanskanen, K. Ahola, D. Anderson, S. Bakshi, R. A. Baragi-  
137 ola, B. L. Barraclough, R. K. Black, S. Bolton, T. Booker, R. Bowman, P. Casey, F. J.  
138 Crary, D. Delapp, G. Dirks, N. Eaker, H. Funsten, J. D. Furman, J. T. Gosling, H. Han-  
139 nula, C. Holmlund, H. Huomo, J. M. Illiano, P. Jensen, M. A. Johnson, D. R. Linder,  
140 T. Luntama, S. Maurice, K. P. McCabe, K. Mursula, B. T. Narheim, J. E. Nordholt,  
141 A. Preece, J. Rudzki, A. Ruitberg, K. Smith, S. Szalai, M. F. Thomsen, K. Viherkanto,  
142 J. Vilppola, T. Vollmer, T. E. Wahl, M. Wüest, T. Ylikorpi, and C. Zinsmeyer (2004),  
143 Cassini Plasma Spectrometer Investigation, *Space Science Reviews*, *114*, 1–112, doi:  
144 10.1007/s11214-004-1406-4.

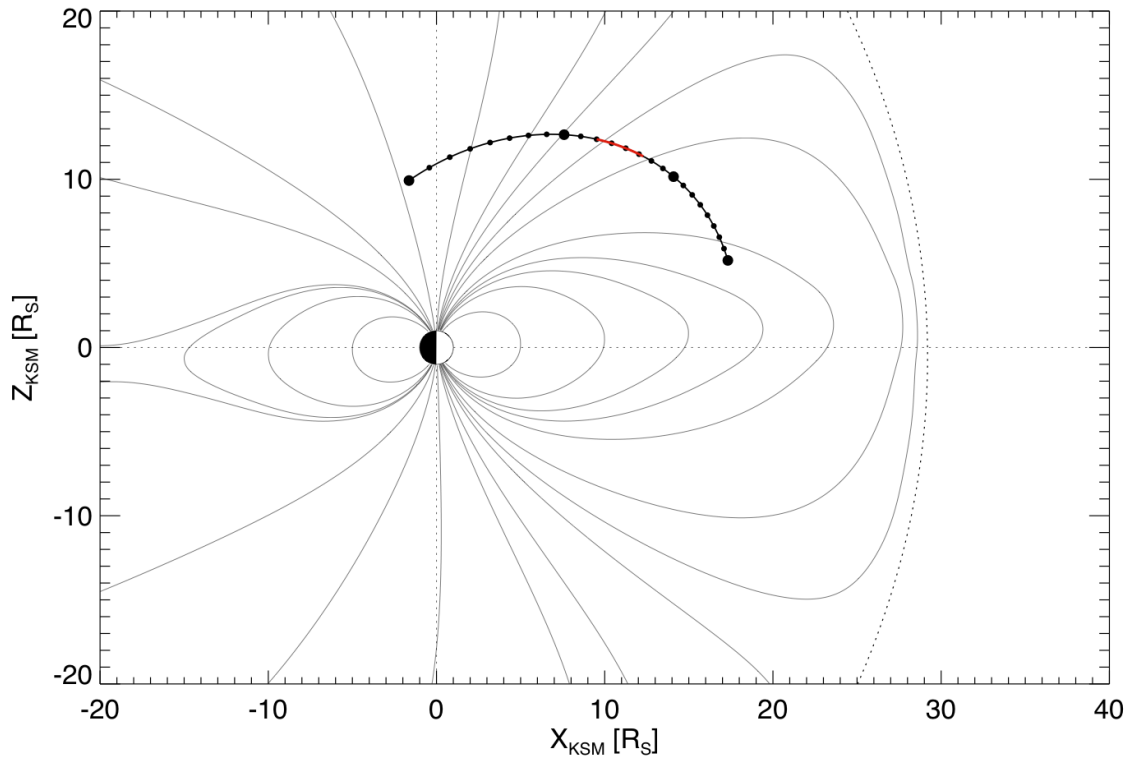

**Figure A.** Trajectory of Cassini for the 20-22nd January 2009. The figure shows the X-Z projection of the orbit in the Kronocentric-Solar-Magnetospheric (KSM) coordinate system. The Sun is to the right and the view is from dawn. The section of the trajectory highlighted in red shows the part of the trajectory where we observe the cusp. The large dots represent the start of a day in UT, with the closest to the equator being the start of the 20th of January 2009. The smaller dots are separated by three hour intervals. Shown in grey is the Khurana magnetospheric field-line model [*Khurana et al.*, 2006], with the dotted line representing the average position of the magnetopause.

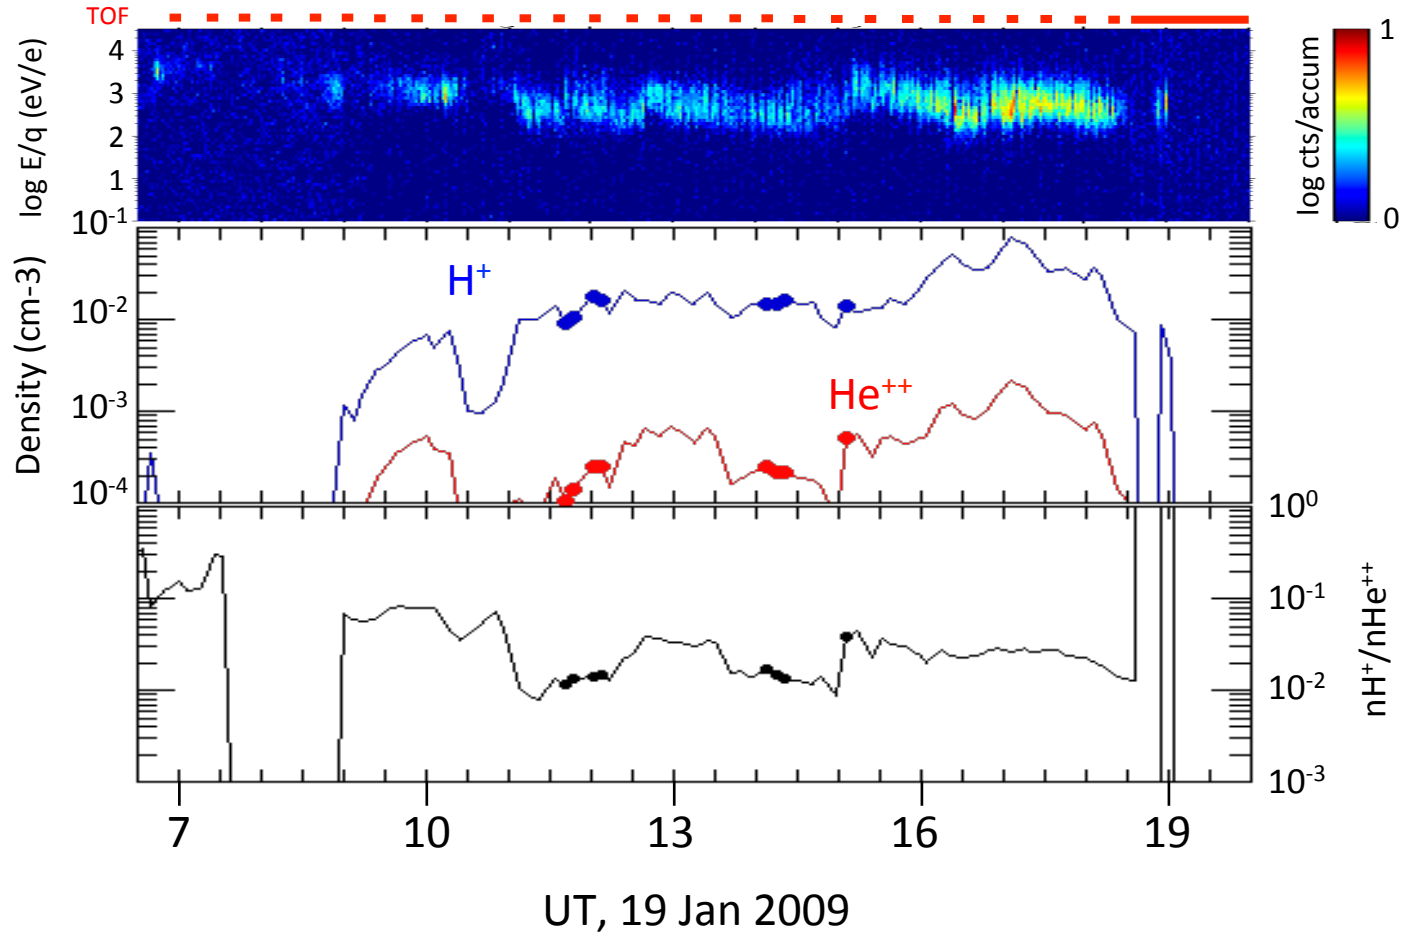

**Figure B.** Top: Ion spectrogram (all detectors summed together). Middle: light-ion densities. Bottom: the ratio of the  $m/q=2$  to  $m/q=1$  densities. The red bars at the top show the intervals during which time-of-flight (TOF) data were obtained. The ion spectrum does not change radically over this time interval, so we do not expect a change in the TOF data in between the intervals.

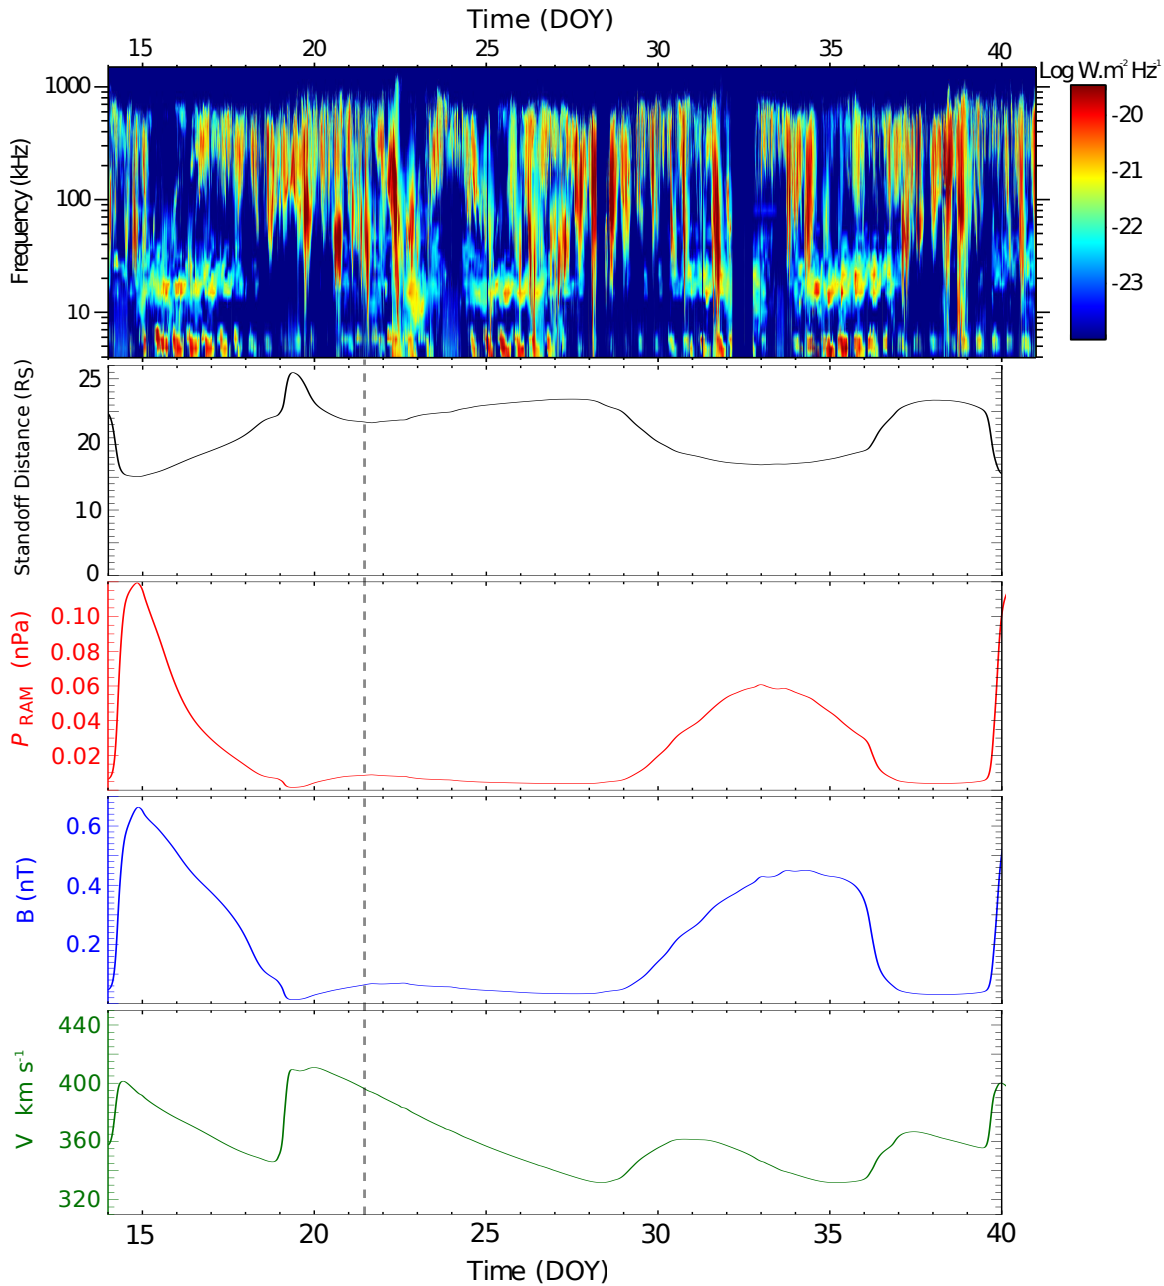

**Figure C.** Upstream conditions for 14 Jan - 7 Feb 2008. (a) Saturn Kilometric Radiation (SKR) as observed by RPWS (presented as a flux density at 1AU). The data has been processed as explained by *Lamy et al.* [2008]. Below this, ENLIL solar wind conditions model results: (b) standoff distance of the magnetopause, (c) ram pressure, (d) the magnetic field strength and (e) velocity.

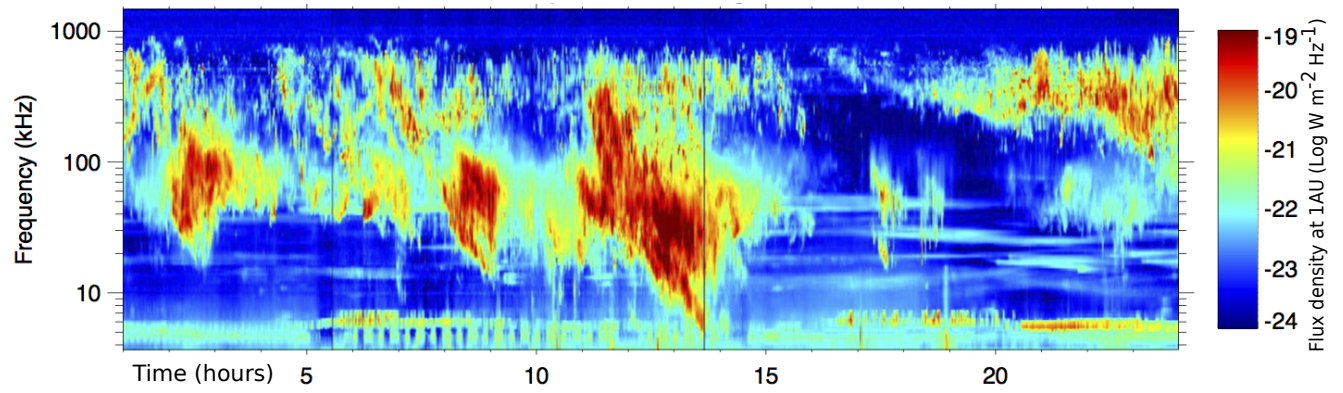

**Figure D.** Saturn kilometric radiation as observed by RPWS on the day of the cusp observation. On the x-axis is the universal time shown in hours. The data is presented as a flux density at 1AU ( $\text{Log W m}^{-2} \text{ Hz}^{-1}$ )
